# Supplementary material
Source: Research Square preprint supplement (doi:10.21203/rs.3.rs-9438585/v1)

Figure 3

CD19


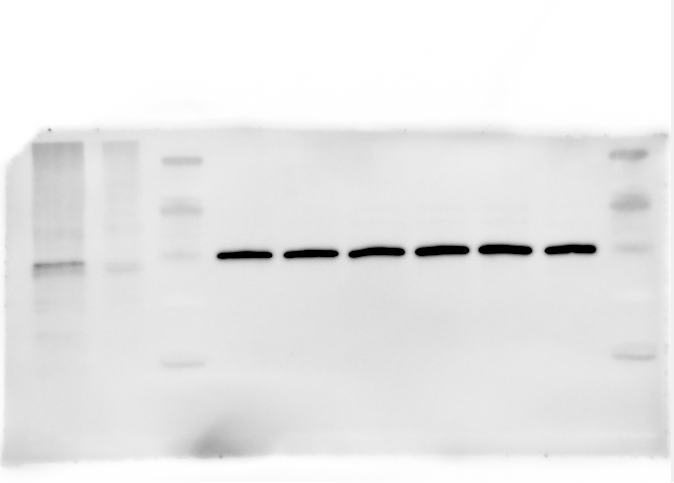


IL-10


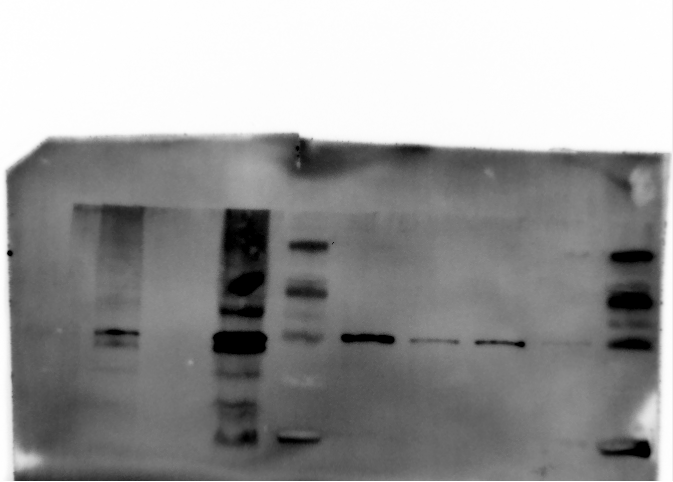


TGF-B1


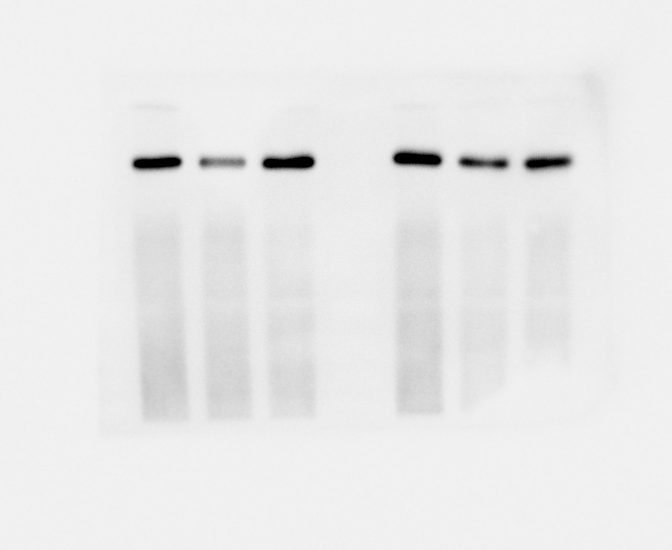


GAPDH


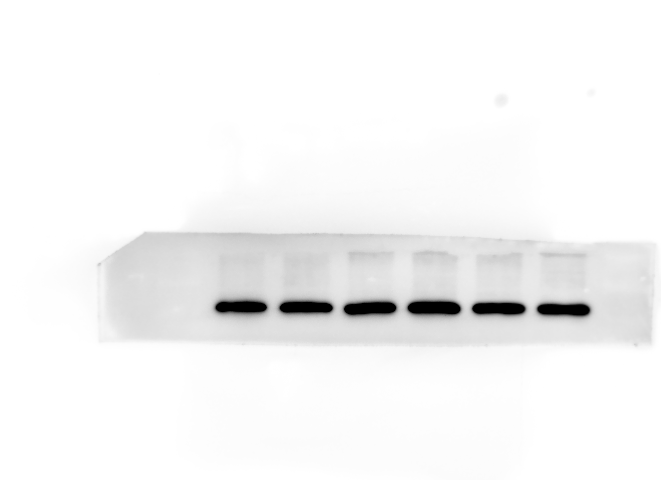


CD79A


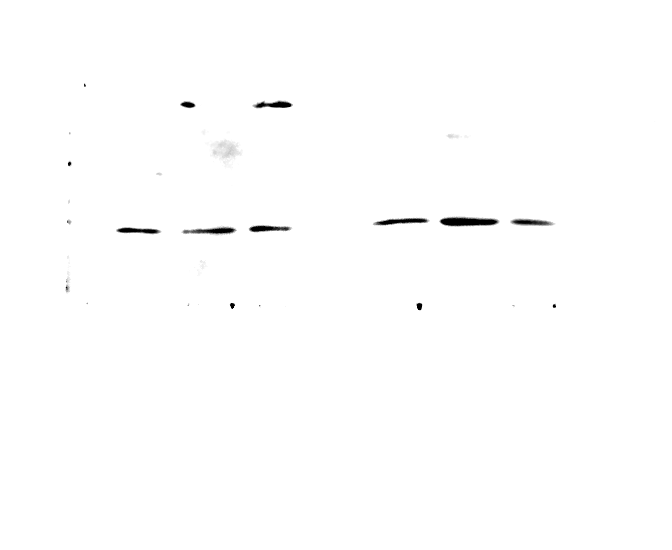


TLR9


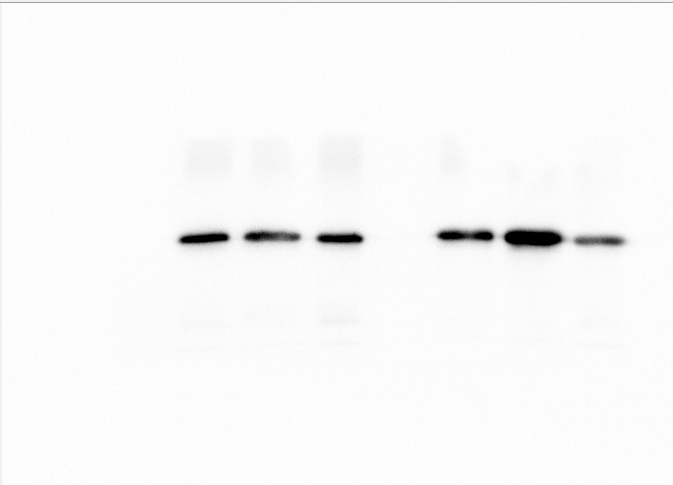


EEA1


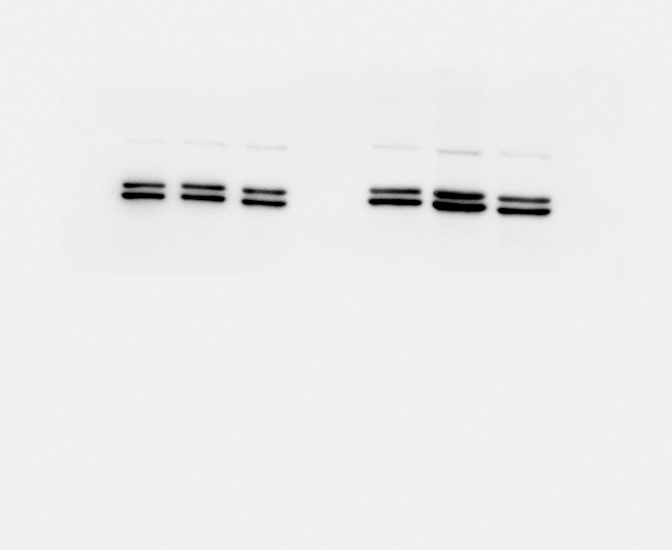


RAB7


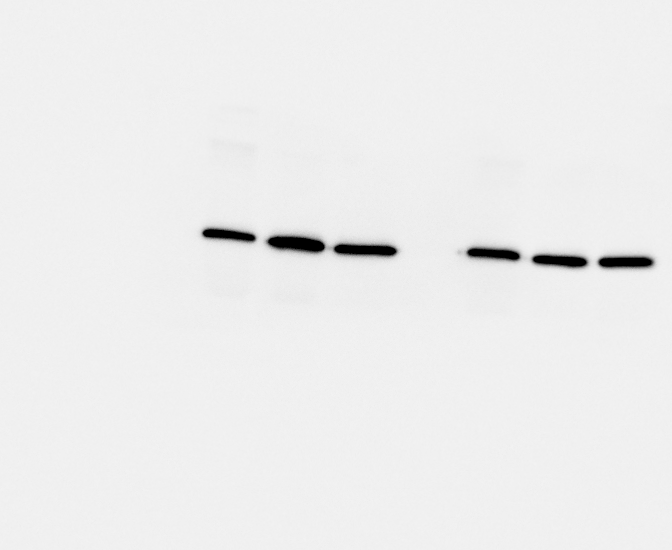


GAPDH


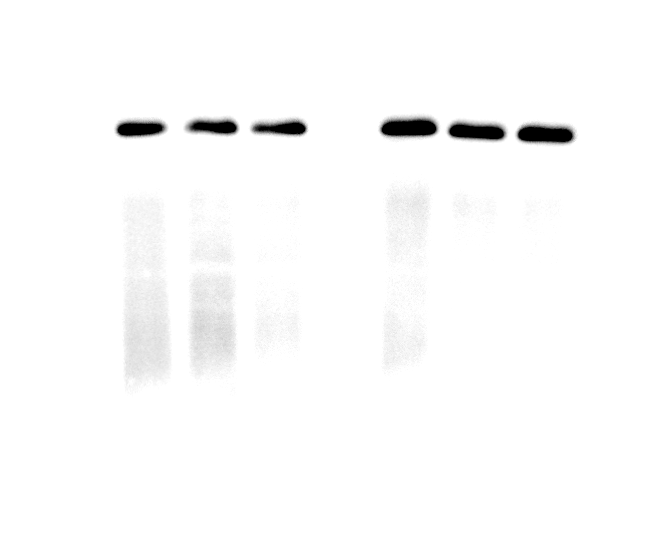


Figure 7

TLR9_IP


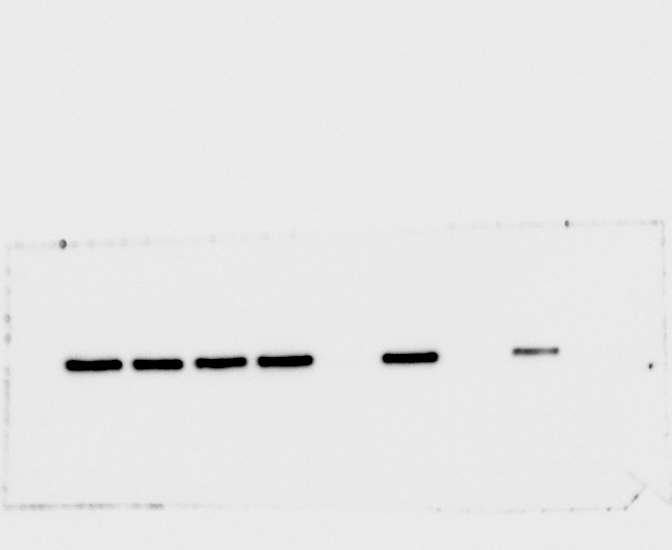


CXCL2_IP


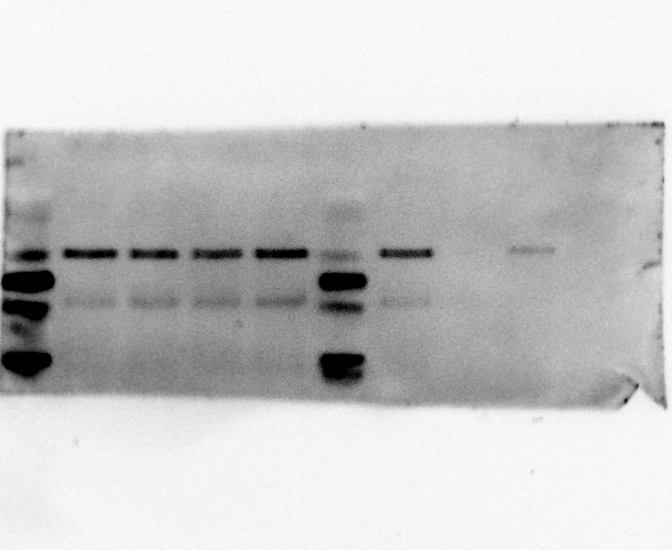


TLR9


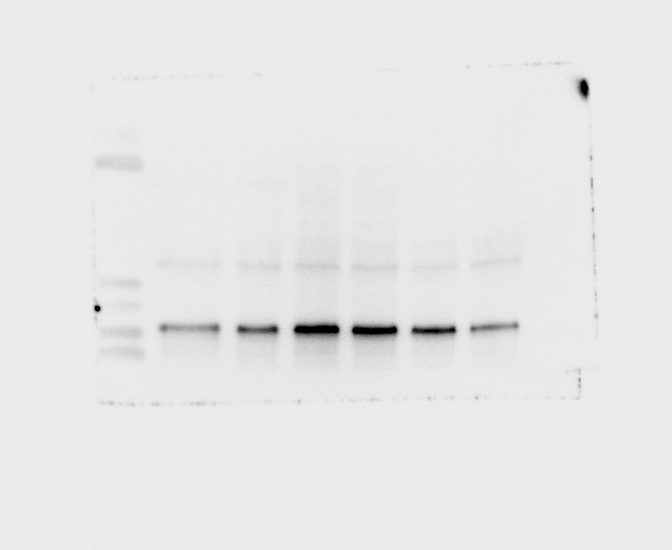


MyD88


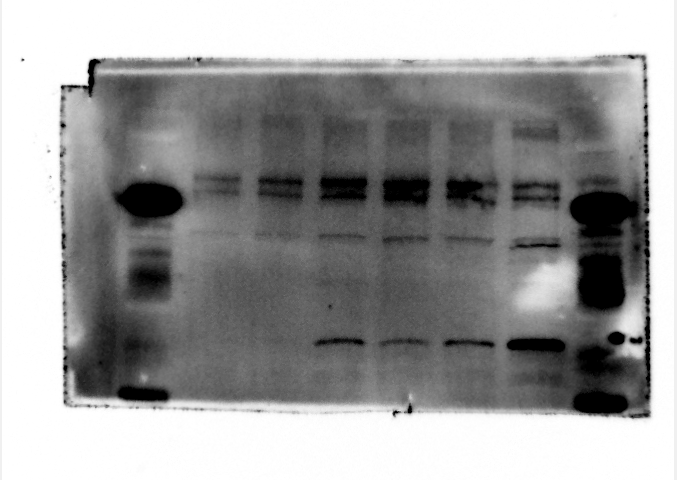


NF-kB


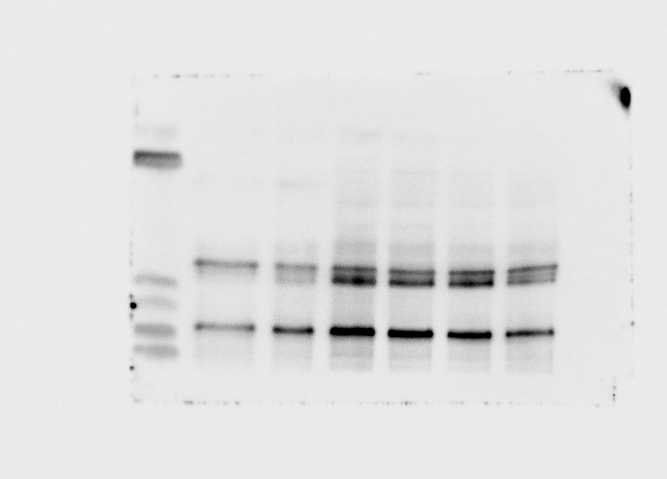


CXCL2


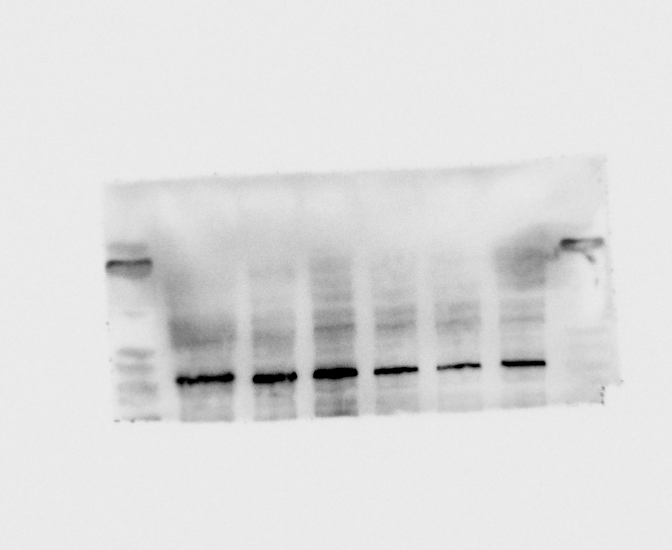


GAPDH


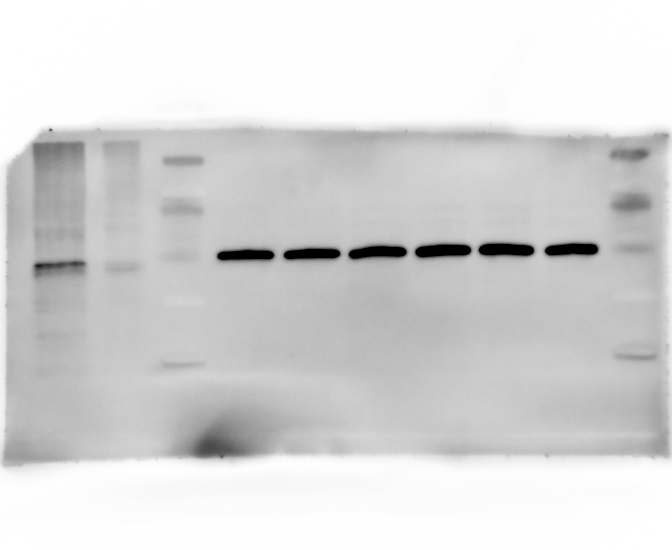

Supplement: Supplementary file 1 [file ebc4fd32d3b0062d92c12df7.doc]
